# Supplementary material for: Integrative genomic analysis reveals widespread enhancer regulation by p53 in response to DNA damage
Source: PubMed Central journal article supplement (PMC4482066; doi:10.1093/nar/gkv284), 2015-04-16
Supplement: supp_gkv284_nar-03119-d-2014-File012.pdf [file supp_gkv284_nar-03119-d-2014-File012.pdf]

## **Integrative Genomic Analysis Reveals Widespread Enhancer Regulation by p53 in Response to DNA Damage**

Scott T. Younger<sup>1,2</sup>, Daniela Kenzelmann-Broz<sup>3</sup>, Heiyoun Jung<sup>3</sup>, Laura D. Attardi<sup>3</sup>, and John L. Rinn<sup>1,2,\*</sup>

<sup>1</sup>Department of Stem Cell and Regenerative Biology, Harvard University, Cambridge, MA 02138, USA. <sup>2</sup>Broad Institute of MIT and Harvard, Cambridge, MA 02142, USA. <sup>3</sup>Division of Radiation and Cancer Biology, Department of Radiation Oncology, Stanford University School of Medicine, Stanford, CA USA.

### **Supplementary Information**

Supplementary Table 1. Summary of differential gene expression in human and mouse primary fibroblasts in response to doxorubicin treatment.

Supplementary Table 2. PCR Primers and PCR conditions.

Supplementary File 1. Summary of the p53-regulated transcriptome: gene names, genomic coordinates, expression values, fold changes, and corresponding p53 binding sites for p53-regulated transcripts (mRNAs and lincRNAs) in human and mouse primary fibroblasts in response to doxorubicin treatment.

Supplementary File 2. Summary of guilt-by-association predictions for p53-regulated lincRNA functions: gene set enrichment analysis (GSEA) output.

Supplementary File 3. Summary of p53 binding sites within annotated chromatin states: coordinates of p53 binding sites and corresponding chromatin state annotations.

Supplementary Figure 1. Comparison of p53 binding sites across multiple cell types and treatments. **(A-C)** Comparison of p53 binding sites characterized in this study with sites identified in previous studies using various forms of p53 activation in **(A)** MCF7, **(B)** lymphoblastoid, and **(C)** U2OS cells. **(D)** Comparison of p53 binding sites in doxorubicin treated human fetal fibroblasts (this study), lymphoblastoid cells, and U2OS cells.

Supplementary Figure 2. Enrichment analysis of Alu/B1 family elements within lincRNAs regulated by p53 relative to reference lincRNA catalogs in **(A)** primary human fibroblasts (Alu) and **(B)** primary mouse embryonic fibroblasts (B1).

# Supplementary Figure 1

**A** ● Younger et al.  
 ● Nikulenkov et al. Cell Death Differ. 2012 Dec;19(12):1992-2002.

|                                       |                                       |                                       |
|---------------------------------------|---------------------------------------|---------------------------------------|
| ● Doxorubicin (hFetal Fibro.) : 2,638 | ● Doxorubicin (hFetal Fibro.) : 2,638 | ● Doxorubicin (hFetal Fibro.) : 2,638 |
| ● Nutlin (MCF7) : 17,958              | ● 5FU (MCF7) : 11,320                 | ● RITA (MCF7) : 11,477                |
| ● Overlap : 1,652                     | ● Overlap : 1,366                     | ● Overlap : 1,707                     |

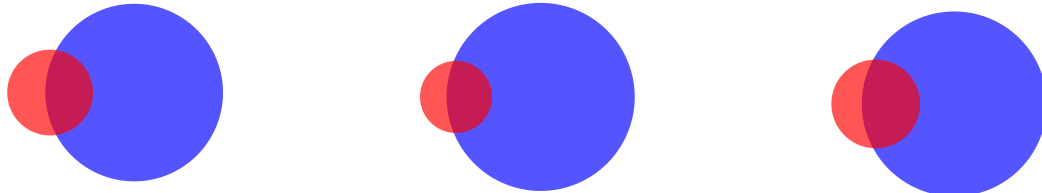

**B** ● Younger et al.  
 ● Zeron-Medina et al. Cell. 2013 Oct 10;155(2):410-22.

|                                       |                                         |                                       |
|---------------------------------------|-----------------------------------------|---------------------------------------|
| ● Doxorubicin (hFetal Fibro.) : 2,638 | ● Doxorubicin (hFetal Fibro.) : 2,638   | ● Doxorubicin (hFetal Fibro.) : 2,638 |
| ● Nutlin (Lymphoblastoid) : 1,183     | ● Doxorubicin (Lymphoblastoid) : 13,055 | ● IR (Lymphoblastoid) : 237           |
| ● Overlap : 351                       | ● Overlap : 1,668                       | ● Overlap : 161                       |

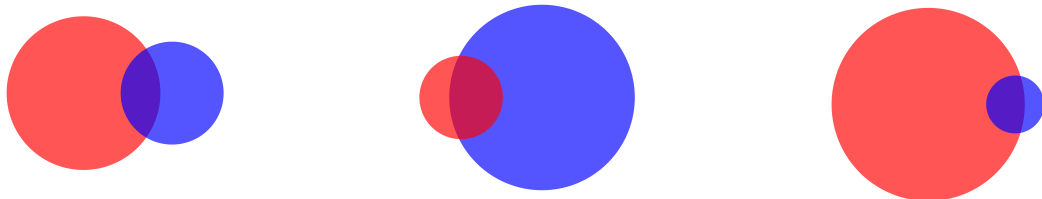

**C** ● Younger et al.  
 ● Menendez et al. Nucleic Acids Res. 2013 Aug;41(15):7286-301.

|                                       |                                       |
|---------------------------------------|---------------------------------------|
| ● Doxorubicin (hFetal Fibro.) : 2,638 | ● Doxorubicin (hFetal Fibro.) : 2,638 |
| ● Nutlin (U2OS) : 18,156              | ● Doxorubicin (U2OS) : 3,087          |
| ● Overlap : 2,226                     | ● Overlap : 1,555                     |

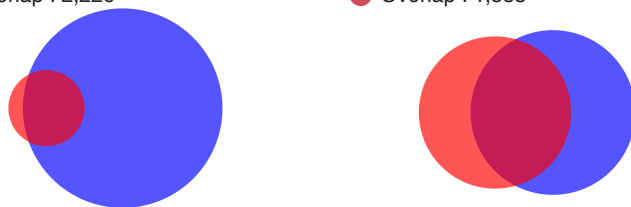

**D** All Doxorubicin Samples (Diagram Not Scaled)

|                                         |
|-----------------------------------------|
| ● Doxorubicin (hFetal Fibro.) : 2,638   |
| ● Doxorubicin (Lymphoblastoid) : 13,055 |
| ● Doxorubicin (U2OS) : 3,087            |

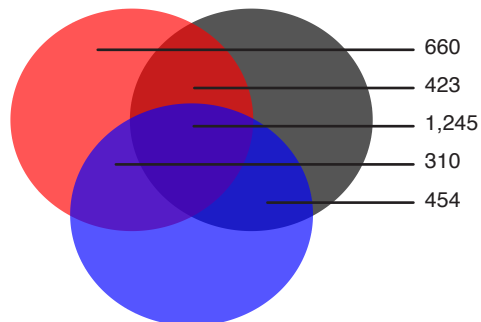

# Supplementary Figure 2

## A

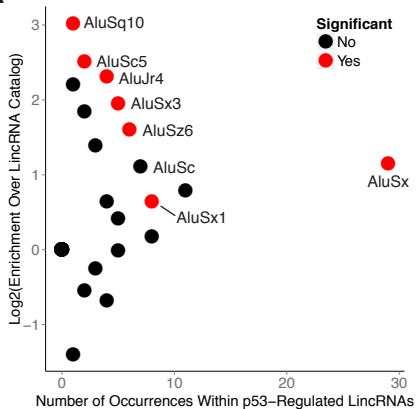

## B

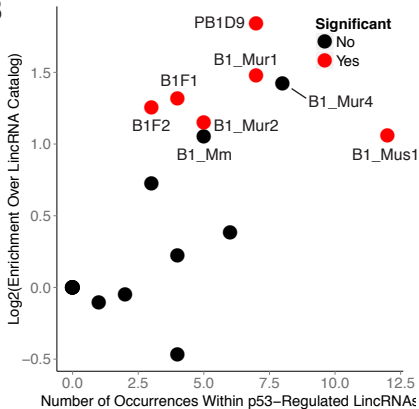

Supplementary Table 1. Summary of differential gene expression in response to doxorubicin treatment.

|                       |                    | Human             |                 | Mouse             |                 |
|-----------------------|--------------------|-------------------|-----------------|-------------------|-----------------|
|                       |                    | mRNA              | lincRNA         | mRNA              | lincRNA         |
| <b>Up-regulated</b>   | <b>Total</b>       | <b>1365</b>       | <b>101</b>      | <b>3124</b>       | <b>94</b>       |
|                       | <b>p53 Targets</b> | <b>262 (19%)</b>  | <b>22 (22%)</b> | <b>585 (19%)</b>  | <b>21 (22%)</b> |
| <b>Down-regulated</b> | <b>Total</b>       | <b>1598</b>       | <b>32</b>       | <b>3334</b>       | <b>99</b>       |
|                       | <b>p53 Targets</b> | <b>106 (6.6%)</b> | <b>1 (3.1%)</b> | <b>175 (5.2%)</b> | <b>4 (4%)</b>   |

Supplementary Table 2. PCR Primers and PCR conditions.

| Target               | Direction | Use       | Sequence                 |
|----------------------|-----------|-----------|--------------------------|
| LincRNA-7            | Forward   | RT-qPCR   | TGCTGCATTTACAGGTGAGG     |
| LincRNA-7            | Reverse   | RT-qPCR   | AGGATGGCAGGTACATGAGG     |
| LincRNA-4            | Forward   | RT-qPCR   | GGAGCCTAGCATCACTCGTC     |
| LincRNA-4            | Reverse   | RT-qPCR   | CTCCTCTTCCAGCAGTTTGG     |
| LincRNA-1            | Forward   | RT-qPCR   | AAGCCAAGCTTCCTGTTTCA     |
| LincRNA-1            | Reverse   | RT-qPCR   | GGTCTAGGGGATGGGAATA      |
| LincRNA-7 Promoter   | Forward   | ChIP-qPCR | GCACGGACTGAGAAACACAA     |
| LincRNA-7 Promoter   | Reverse   | ChIP-qPCR | GGGGCATTGGAGATTTTG       |
| LincRNA-4 Promoter   | Forward   | ChIP-qPCR | ACTTACCATGGGCAGTCAGC     |
| LincRNA-4 Promoter   | Reverse   | ChIP-qPCR | GGGTGGTGGGTGTCACTAAA     |
| LincRNA-1 Promoter   | Forward   | ChIP-qPCR | AGTGGACTGGAGCCTGACAT     |
| LincRNA-1 Promoter   | Reverse   | ChIP-qPCR | AGCACCACCTCACACATTGA     |
| Enhancer Region-1    | Forward   | ChIP-qPCR | CCACAGGCTGCACAAGATAA     |
| Enhancer Region-1    | Reverse   | ChIP-qPCR | TCTGAAAGTGATGCTGTGGAA    |
| Enhancer Region-2    | Forward   | ChIP-qPCR | GCCAGGCAATTTTGTGATT      |
| Enhancer Region-2    | Reverse   | ChIP-qPCR | TAGCCTGCTGGATGATGAAA     |
| Unannotated Region-1 | Forward   | ChIP-qPCR | AGGCAGTGGAGAGTGGAGAA     |
| Unannotated Region-1 | Reverse   | ChIP-qPCR | GACCCTTGCAACCTGCTTAG     |
| GAPDH Promoter       | Forward   | ChIP-qPCR | TACTAGCGGTTTTACGGGCG     |
| GAPDH Promoter       | Reverse   | ChIP-qPCR | TCGAACAGGAGGAGCAGAGAGCGA |

| PCR Conditions | Denature   | Annealing  | Extension  | Cycles |
|----------------|------------|------------|------------|--------|
| RT-qPCR        | 95°C, 20 s | 57°C, 30 s | 72°C, 45 s | x40    |
| ChIP-qPCR      | 95°C, 20 s | 57°C, 30 s | 72°C, 45 s | x40    |
